# Supplementary material
Source: publisher figshare collection journal article supplement (https://karger.figshare.com/ndownloader/files/26848553)
Supplement: Supplementary file 1 [file 26848553]

### **Supplementary Table 4**

Antibiotic resistance pattern of the dehumidifier isolates by disk diffusion method.

| **Organism (strain ID)/ antibacterial agent** | **Interpretation of zone diameters (mm)** | | **Organism (strain ID)/ antibacterial agent** | **Interpretation of zone diameters (mm)** | |
| --- | --- | --- | --- | --- | --- |
| *Sphingomonas ginsenosidimutans* /  (HF930756.1) (a) | **mm** | **categorization** | *Pseudomonas fluorescens* /  (KT223384.1) (b) | **mm** | **Categorization** |
| Amikacin  Ciprofloxacin  Doripenem  Gentamicin  Meropenem  Imipenem  Piperacillin  Piperacillin-tazobactam | 18.7±2.3  48.7±2.3  48.7±2.3  15.3±1.2  32.7±1.2  53.3±3.5  54.7±4.2  50.7±1.2 | I  S  S  R  S  S  S  S | Amikacin  Ciprofloxacin  Doripenem  Gentamicin  Meropenem  Imipenem  Piperacillin  Piperacillin-tazobactam | 36±0  42±2  26.7±1.2  34.7±1.2  6±0  25.3±2.3  30±0  34.7±1.2 | S  S  S  S  R  S  S  S |
| *Sphingomonas yunnanesis* /  (JF459957.1) (a) |  |  | *Kocuria rhizophlia* /  (KC429605.1)(c) |  |  |
| Amikacin  Ciprofloxacin  Doripenem  Gentamicin  Meropenem  Imipenem  Piperacillin  Piperacillin-tazobactam | 16±4  36±1.2  50±0  16±4  31.3±4.6  55.3±1.2  58±3.5  58±2 | I  S  S  R  S  S  S  S | Amikacin  Ciprofloxacin  Doripenem  Gentamicin  Imipenem  Polyxaycin-B  Piperacillin-tazobactam | 31.3±4.2  13.7±1.5  40+0  30±0  40+0  21.3±2.3  33.3±5.8 | S  R  S  S  S  ND  S |
| *Novosphingobium barchaimii* / (LN613112.1) (a) |  |  | *Staphylococcus pasteuri* /  (KR856343.1) (c) |  |  |
| Amikacin  Ciprofloxacin  Doripenem  Gentamicin  Meropenem  Imipenem  Piperacillin  Piperacillin-tazobactam | 28±0  28±1.2  42.7±2.3  31.3±0  30±0  50±0  26.7±1.2  30±0 | S  S  S  S  S  S  S  S | Amikacin  Ciprofloxacin  Gentamicin  Chloramphenicol  Erythromycin  Tetracycline  Vanciomycin | 29.3±1.2  24.3±1.2  31.3±1.2  25.3±1.2  30±0  32.7±1.2  20±0 | S  S  S  S  S  S  S |
| *Kytococcus sedentarius* /  (KC583230.1) (c) |  |  |  |  |  |
| Amikacin  Ciprofloxacin  Doripenem  Gentamicin  Imipenem  Vancomycin  Rifampin  Erythromycin  Tetracycline  Chloramphenicol  Piperacillin-tazobactam | 29.3±1.7  9±0  24.3±1.5  31.7±2.1  29±1.7  32.3±3.8  39.7±5.5  9.3±0.6  27±3  20.7±1.2  10.3±1.5 | S  R  ND  S  ND  ND  S  R  S  S  ND |  |  |  |

(a) Breakpoint of non-fermentative criteria was applied for this organism [Sader and Jones, 2005] . (b) Breakpoint criteria of *Pseudomonas* spp. (c) Interpretive criteria for Staphylococci was applied for this organism [Mnifet al., 2006; Saviniet al., 2010] . * Symbols in categorization indicate sensitivity testing level as S, Susceptibility; R, resistance; I, moderate sensitivity; ND, not determined. British Society for Antimicrobial Chemotherapy (BSAC) was used as reference guidance.
